# Supplementary material for: Effect of an auxiliary acceptor on D–A–π–A sensitizers for highly efficient and stable dye-sensitized solar cells
Source: Royal Society of Chemistry journal article supplement (doi:10.1039/c6ta05588e), 2016-01-01
Supplement: c6ta05588e1.pdf [file c6ta05588e1.pdf]

## Electronic Supplementary Information

### **Effect of an Auxiliary Acceptor on D-A- $\pi$ -A Sensitizers for Highly Efficient and Stable Dye-Sensitized Solar Cells**

*Yuting Gao,<sup>a,b</sup> Xing Li,<sup>a</sup> Yue Hu,<sup>c,d</sup> Yeli Fan,<sup>b</sup> Jianyong Yuan,<sup>a</sup> Neil Robertson,<sup>d</sup> Jianli Hua<sup>\*a</sup> and Seth R. Marder<sup>\*b</sup>*

<sup>a</sup> *Key Laboratory for Advanced Materials, Institute of Fine Chemicals, School of Chemistry and Molecular Engineering, East China University of Science and Technology, Shanghai 200237, People's Republic of China.*

<sup>b</sup> *School of Chemistry and Biochemistry and Center for Organic Photonics and Electronics, Georgia Institute of Technology, Atlanta, Georgia 30332-0400, United States*

<sup>c</sup> *Wuhan National Laboratory For Optoelectronics, Huazhong University of Science and Technology, 1037 Luoyu Road, Wuhan, Hubei Province 430074, People's Republic of China*

<sup>d</sup> *School of Chemistry, University of Edinburgh, Edinburgh EH9 3FJ, UK*

Corresponding Author: Tel: (+) 86-21-64250940, Fax: (+) 86-21-64252758

E-mail: [jlhua@ecust.edu.cn](mailto:jlhua@ecust.edu.cn); [seth.marder@chemistry.gatech.edu](mailto:seth.marder@chemistry.gatech.edu)

## 1. DTF simulation of the three compounds

The molecular structures were optimised in vacuum, using the software Avogadro<sup>1</sup> to enter the starting geometry. Then the structure was optimised in dichloromethane, using the optimised structure from vacuum. All calculations were carried out using the Gaussian 09 program<sup>2</sup> with the hybrid B3LYP functional<sup>3</sup> and the standard 6-31G(d) basis set. In the calculations, the long alkyl chains were replaced by methyl groups to reduce computational costs without affecting the nature of frontier molecular orbitals. Time-dependent DFT calculations (TD-DFT) were performed using Gaussian 09 program with a dichloromethane polarisable continuum model (PCM)<sup>4</sup>, using the range-separated CAM-B3LYP functional<sup>5</sup> and the triple-zeta TZVP basis set<sup>6</sup>. The 20 lowest singlet electronic transitions were calculated and processed with the GaussSum software package.<sup>7</sup>

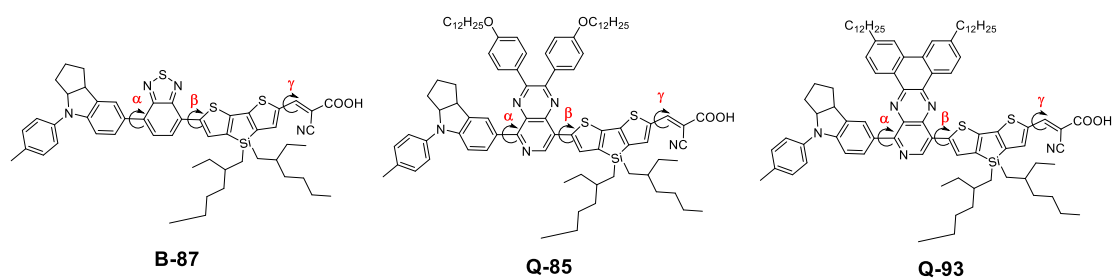

**Fig. S1** Chemical structures of dyes **B-87**, **Q-85** and **Q-93**.

**Table S1.** Molecular orbital distributions and energy optimized in DCM (isodensity=0.020 a.u.).

|        | B-87                                                                                            | Q-85                                                                                             | Q-93                                                                                              |
|--------|-------------------------------------------------------------------------------------------------|--------------------------------------------------------------------------------------------------|---------------------------------------------------------------------------------------------------|
| LUMO+1 | 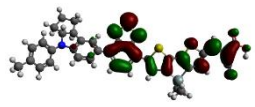<br>-2.42 eV | <br>-2.34 eV | <br>-2.52 eV |
| LUMO   | <br>-2.85 eV | <br>         | <br>         |

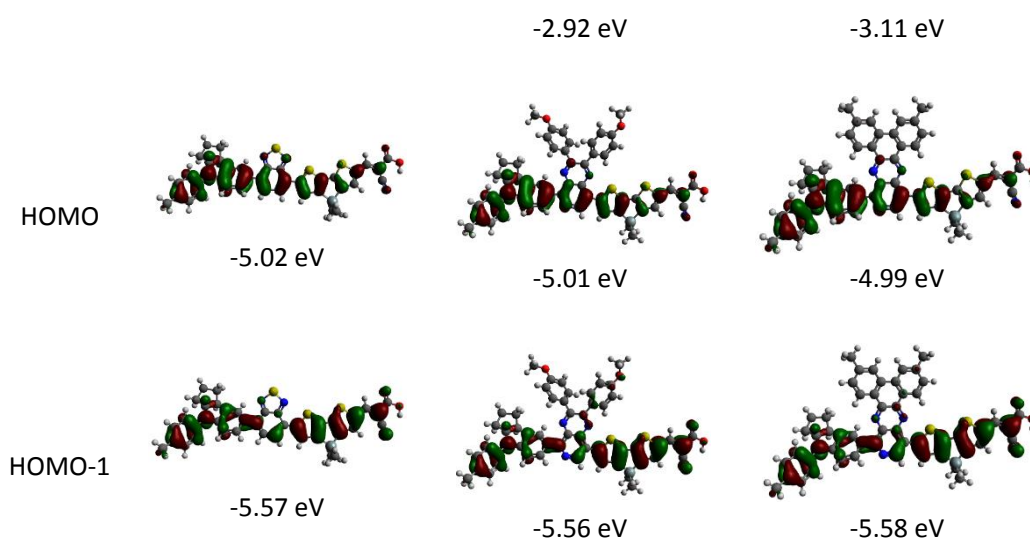

**Table S2.** Dihedral angles and dipole moments of **B-87**, **Q-85** and **Q-93**

| Dyes        | $\alpha$ | $\beta$ | $\gamma$ | Dipole moment |
|-------------|----------|---------|----------|---------------|
| <b>B-87</b> | 33.6°    | -5.6°   | -0.1°    | 13.03         |
| <b>Q-85</b> | 24.7°    | 17.4°   | 0°       | 13.43         |
| <b>Q-93</b> | 29.3°    | 20.4°   | 0°       | 12.17         |

## 2. Optimized process of photoelectrode in DSSCs.

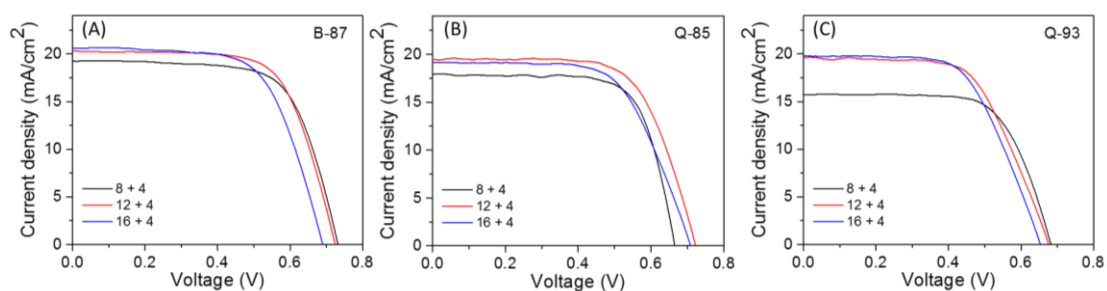

**Fig. S2** *J-V* curves for DSSCs based on the dyes **B-87**, **Q-85** and **Q-93** with different thickness of TiO<sub>2</sub> layer under illumination of AM 1.5 G simulated sunlight (100 mW cm<sup>-2</sup>).

**Table S3.** Photovoltaic performance of the DSSCs based on dyes B-87, Q-85 and Q-93 with different thickness of TiO<sub>2</sub> layer.

| Dye         | TiO <sub>2</sub> Thickness <sup>a</sup> (μm) | V <sub>oc</sub> (mV) | J <sub>sc</sub> (mA cm <sup>-2</sup> ) | FF (%) | PCE (%) |
|-------------|----------------------------------------------|----------------------|----------------------------------------|--------|---------|
| <b>B-87</b> | 8 + 4                                        | 732                  | 18.52                                  | 67.97  | 9.22    |
|             | 12 + 4                                       | 724                  | 20.28                                  | 68.26  | 10.02   |
|             | 16 + 4                                       | 689                  | 20.63                                  | 64.63  | 9.19    |
| <b>Q-85</b> | 8 + 4                                        | 664                  | 17.91                                  | 71.67  | 8.53    |
|             | 12 + 4                                       | 722                  | 19.55                                  | 66.64  | 9.41    |
|             | 16 + 4                                       | 708                  | 19.18                                  | 63.46  | 8.62    |
| <b>Q-93</b> | 8 + 4                                        | 682                  | 15.74                                  | 68.08  | 7.31    |
|             | 12 + 4                                       | 676                  | 19.53                                  | 61.83  | 8.17    |
|             | 16 + 4                                       | 653                  | 19.80                                  | 61.14  | 7.90    |

<sup>a</sup>Thick commercial colloidal paste TiO<sub>2</sub> film layer + scattering TiO<sub>2</sub> film layer.

### 3. Optimized process of CDCA concentration in DSSCs.

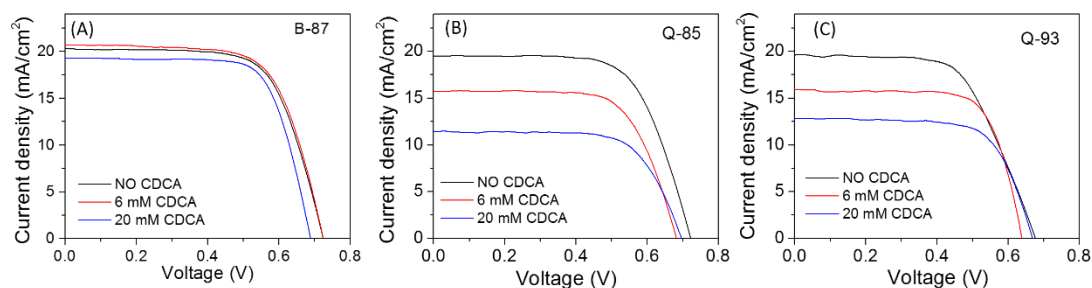

**Fig. S3** *J-V* curves for DSSCs based on the dyes B-87, Q-85 and Q-93 with different concentration of CDCA under illumination of AM 1.5 G simulated sunlight (100 mW cm<sup>-2</sup>) in iodide electrolyte.

**Table S4** Photovoltaic performance of the DSSC based on dyes B-87, Q-85 and Q-93 with different concentration of CDCA.

| Dye         | CDCA  | $V_{oc}$ (mV) | $J_{sc}$ (mA cm <sup>-2</sup> ) | $FF$  | PCE (%) |
|-------------|-------|---------------|---------------------------------|-------|---------|
| <b>B-87</b> | 0     | 724           | 20.28                           | 68.26 | 10.02   |
|             | 6 mM  | 724           | 20.78                           | 67.77 | 10.20   |
|             | 20 mM | 708           | 18.75                           | 65.64 | 8.71    |
| <b>Q-85</b> | 0     | 722           | 19.55                           | 66.64 | 9.41    |
|             | 6 mM  | 682           | 15.74                           | 68.08 | 7.31    |
|             | 20 mM | 696           | 11.40                           | 69.00 | 5.48    |
| <b>Q-93</b> | 0     | 676           | 19.53                           | 61.83 | 8.17    |
|             | 6 mM  | 638           | 15.83                           | 72.67 | 7.35    |
|             | 20 mM | 668           | 12.83                           | 69.20 | 5.93    |

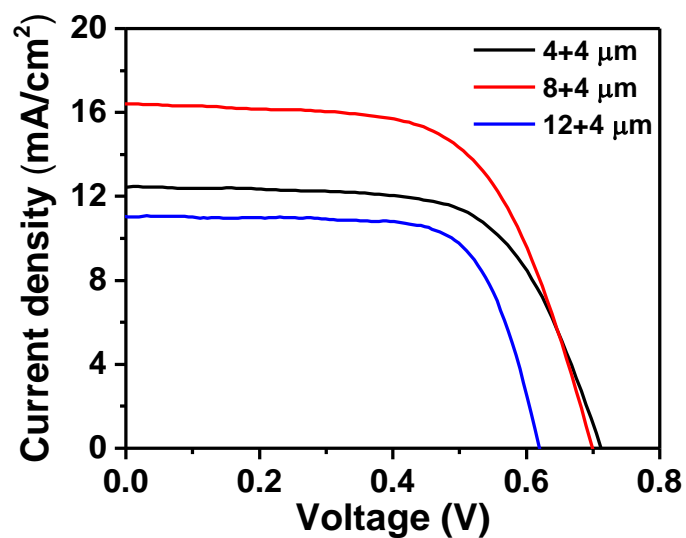

**Fig. S4**  $J$ - $V$  curves for **B-87** based DSSCs with different thickness of the photoelectrode by using ionic liquid electrolyte under illumination of AM 1.5 G simulated sunlight (100 mW cm<sup>-2</sup>).

#### 4. Characterization of compounds B-87, Q-85 and Q-93

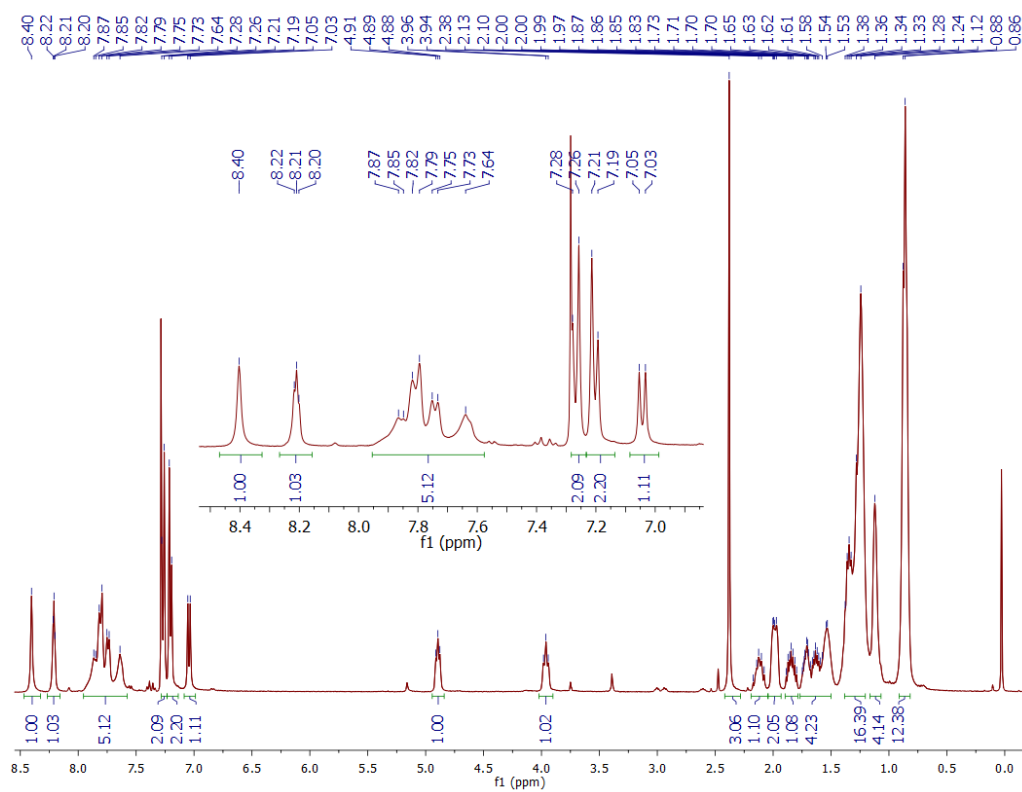

Fig. S5 <sup>1</sup>H NMR spectrum of compound B-87 in CDCl<sub>3</sub>

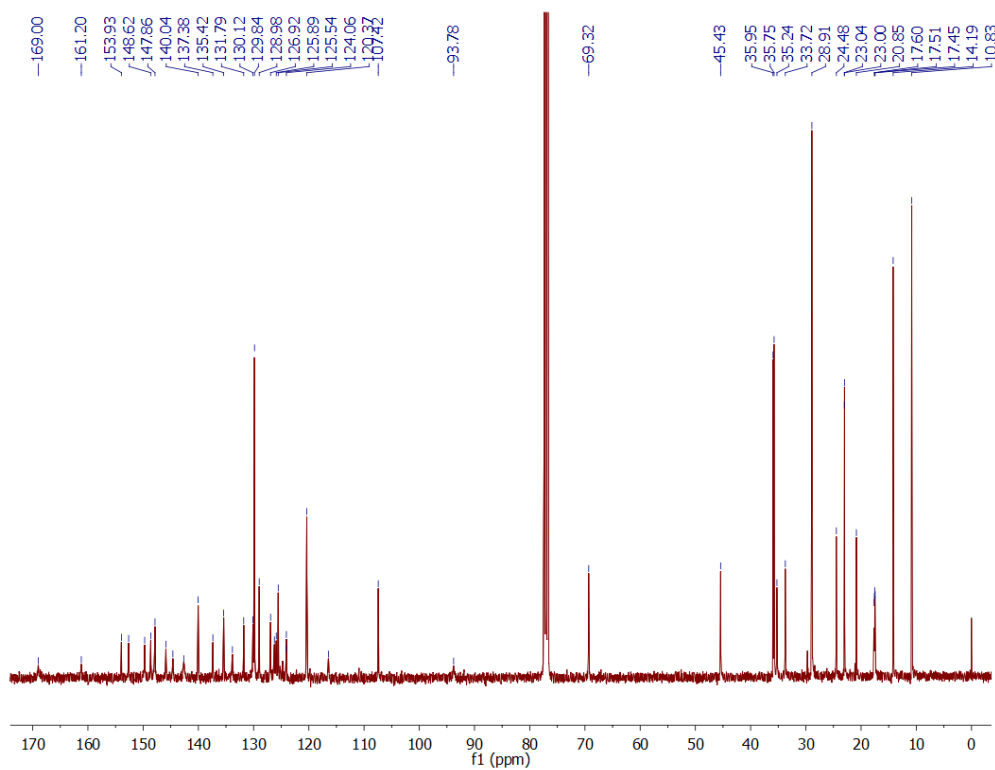

Fig. S6 <sup>13</sup>C NMR spectrum of compound B-87 in CDCl<sub>3</sub>

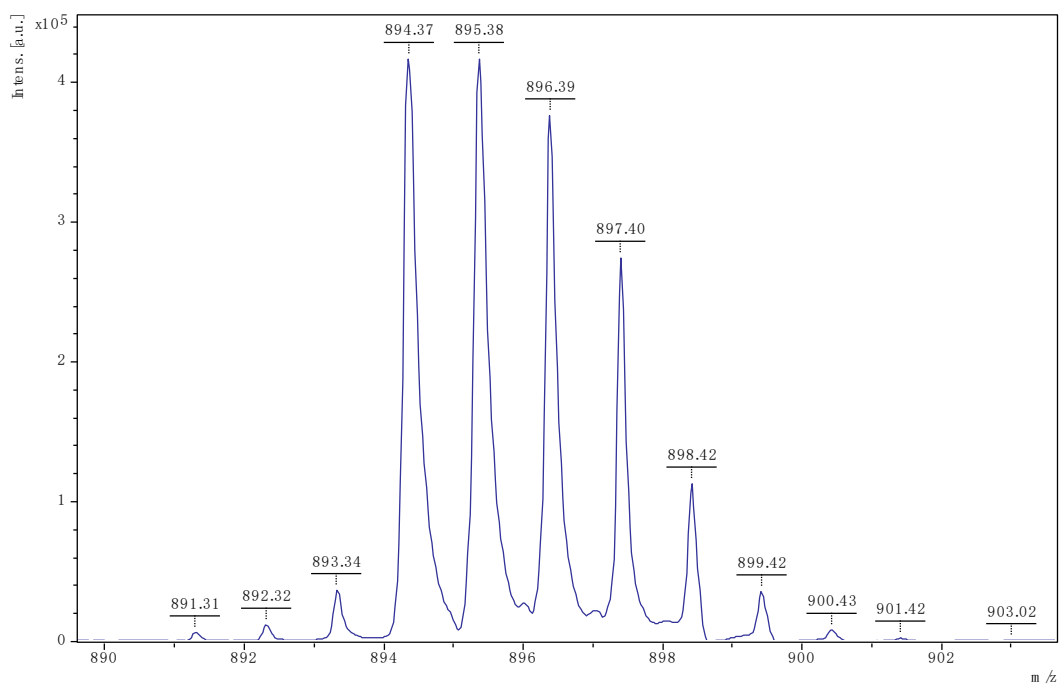

**Fig. S7** MALDI-TOF spectrum of compound **B-87**

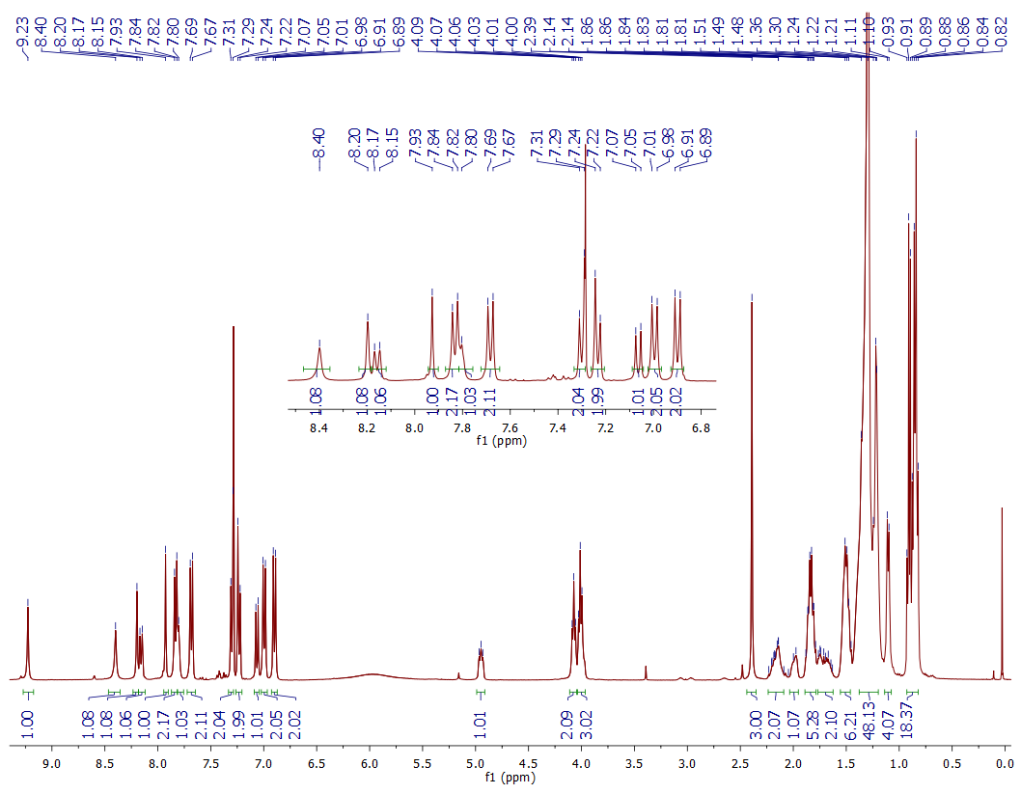

**Fig. S8**  $^1\text{H}$  NMR spectrum of compound **Q-85** in  $\text{CDCl}_3$

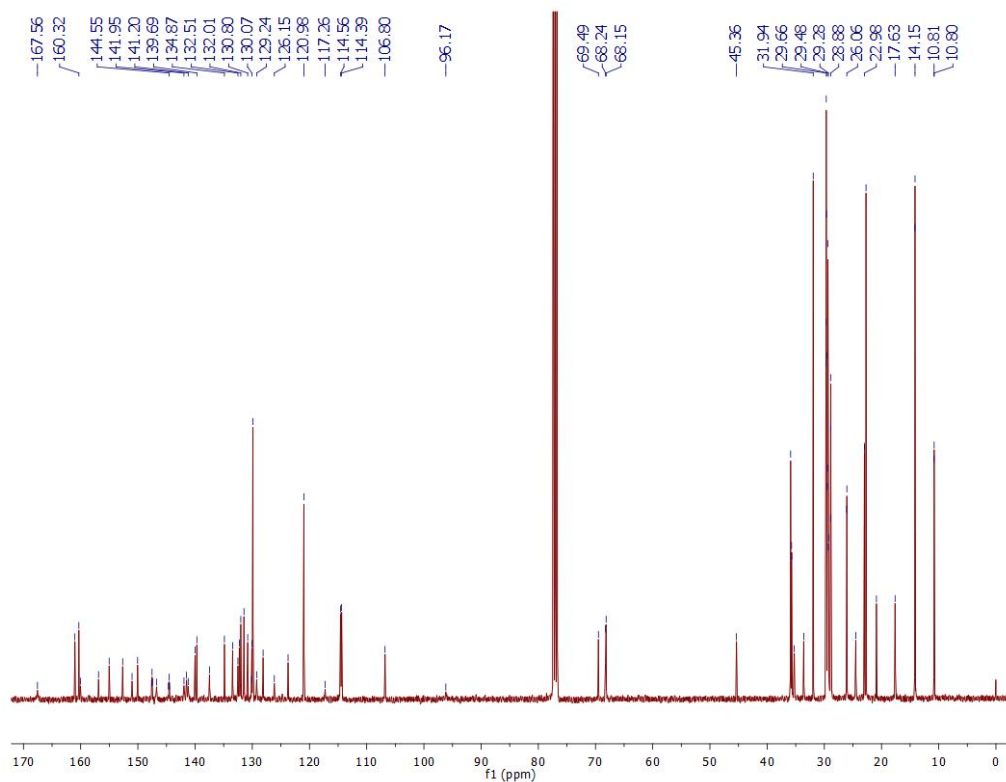

**Fig. S9**  $^{13}\text{C}$  NMR spectrum of compound **Q-85** in  $\text{CDCl}_3$

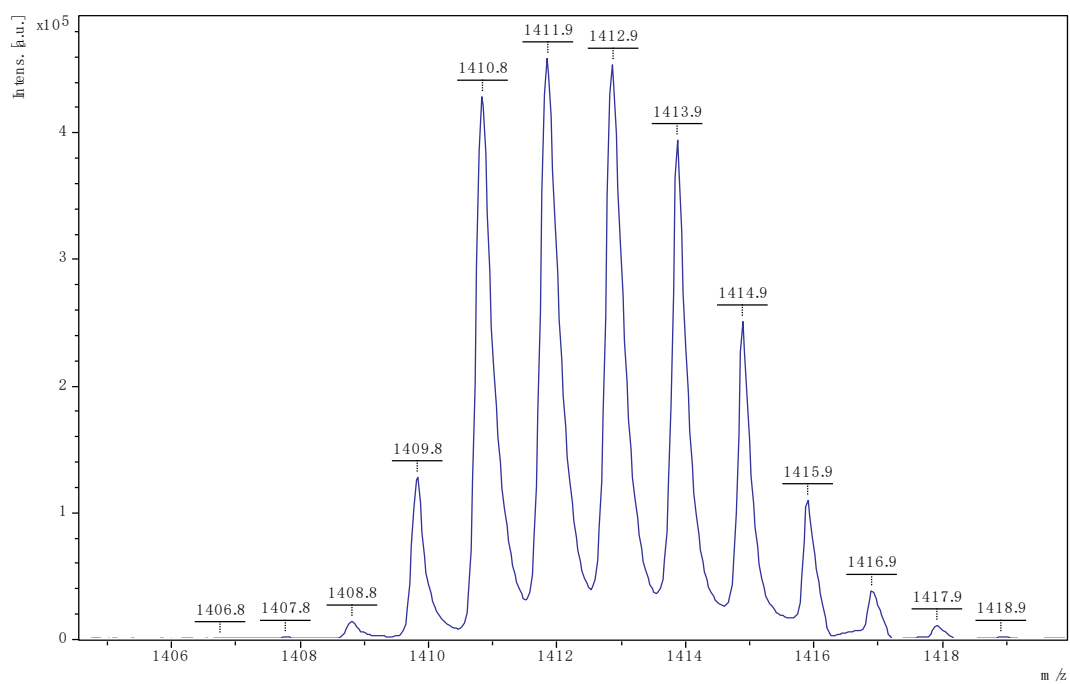

**Fig. S10** MALDI-TOF spectrum of compound **Q-85**



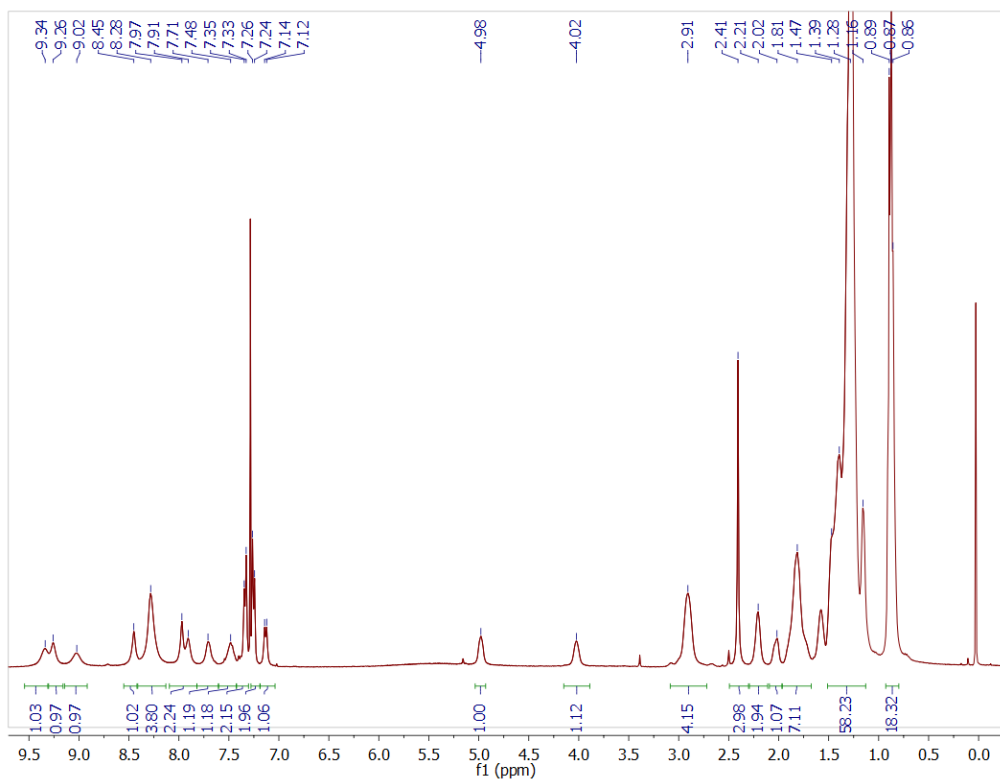

**Fig. S11** MALDI-TOF spectrum of compound **Q-93**

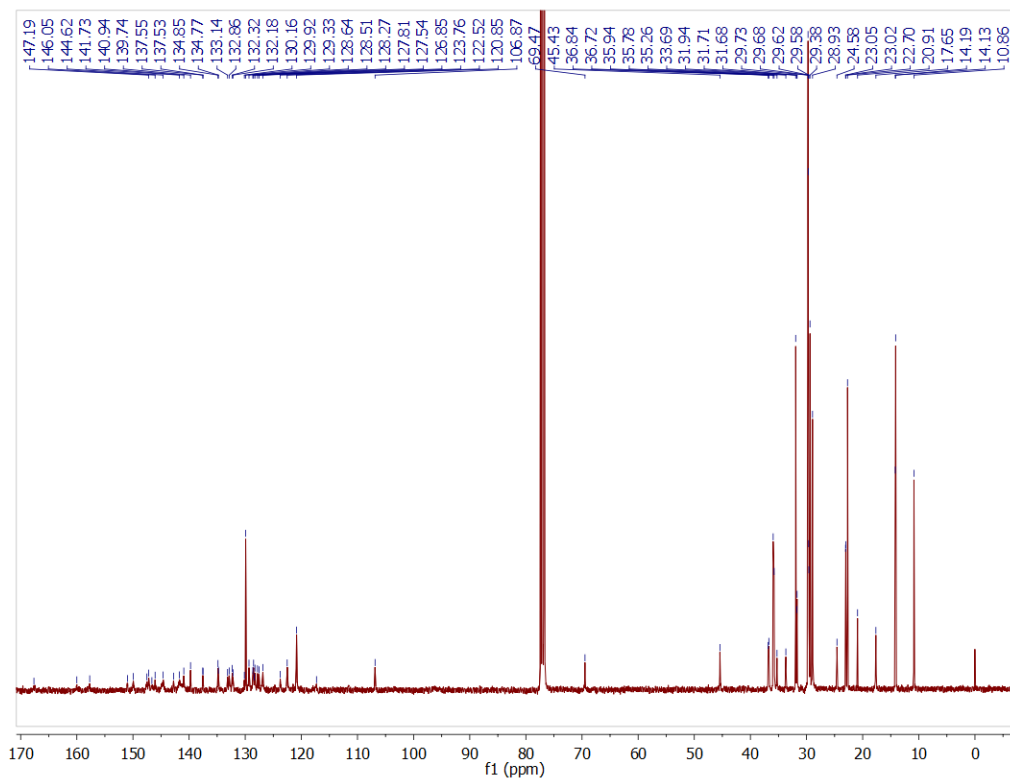

**Fig. S12**  $^{13}\text{C}$  NMR spectrum of compound **Q-93** in  $\text{CDCl}_3$

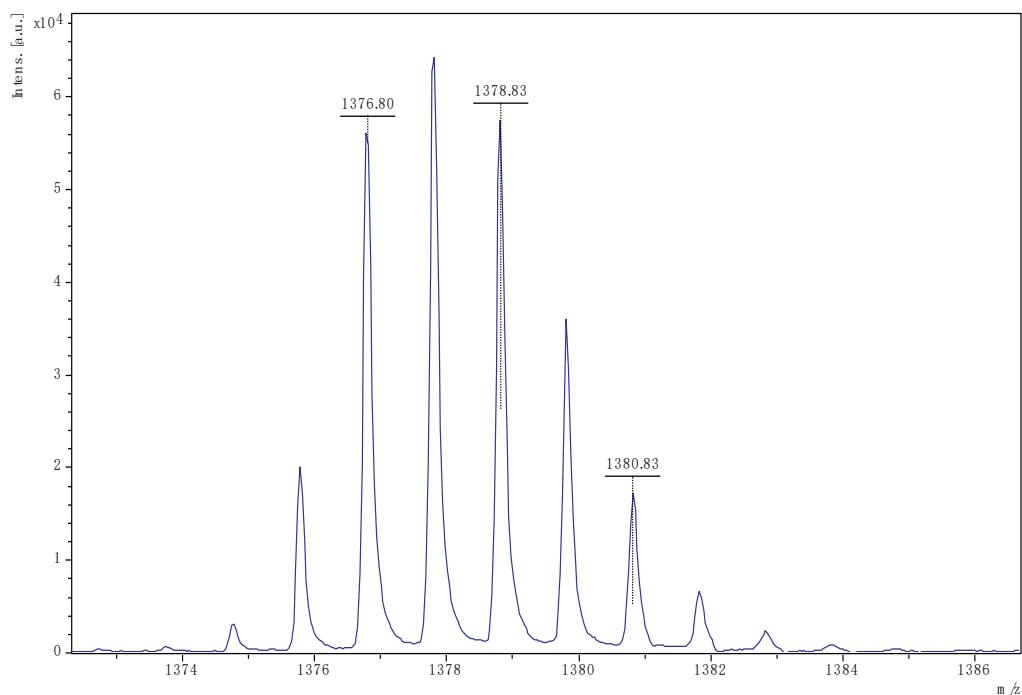

**Fig. S13** MALDI-TOF spectrum of compound **Q-93**

## Reference

1. M. D. Hanwell, D. E. Curtis, D. C. Lonie, T. Vandermeersch, E. Zurek and G. R. Hutchison, *J. Cheminformatics* 2012, **4** (1), 17.
2. Gaussian 09, Revision A.02, M. J. Frisch, G. W. Trucks, H. B. Schlegel, G. E. Scuseria, M. A. Robb, J. R. Cheeseman, G. Scalmani, V. Barone, B. Mennucci, G. A. Petersson, H. Nakatsuji, M. Caricato, X. Li, H. P. Hratchian, A. F. Izmaylov, J. Bloino, G. Zheng, J. L. Sonnenberg, M. Hada, M. Ehara, K. Toyota, R. Fukuda, J. Hasegawa, M. Ishida, T. Nakajima, Y. Honda, O. Kitao, H. Nakai, T. Vreven, J. A. Montgomery, Jr., J. E. Peralta, F. Ogliaro, M. Bearpark, J. J. Heyd, E. Brothers, K. N. Kudin, V. N. Staroverov, R. Kobayashi, J. Normand, K. Raghavachari, A. Rendell, J. C. Burant, S. S. Iyengar, J. Tomasi, M. Cossi, N. Rega, J. M. Millam, M. Klene, J. E. Knox, J. B. Cross, V. Bakken, C. Adamo, J. Jaramillo, R. Gomperts, R. E. Stratmann, O. Yazyev, A. J. Austin, R. Cammi, C. Pomelli, J. W. Ochterski, R. L. Martin, K. Morokuma, V. G. Zakrzewski, G. A. Voth, P. Salvador, J. J. Dannenberg, S. Dapprich, A. D. Daniels, O. Farkas, J. B. Foresman, J. V. Ortiz, J. Cioslowski, and D. J. Fox, Gaussian, Inc.,

Wallingford CT, 2009.

3. A. D. Becke. *J. Chem. Phys.* 1993, **98**, 5648-5652.
4. M. Cossi and V. Barone, *J. Chem. Phys.* 2001, **115** (10), 4708-4717
5. T. Yanai, D. P. Tew and N. C. Handy, *Chem. Phys. Lett.* 2004, **393** (1), 51-57.
6. A. Schäfer, C. Huber and R. Ahlrichs, *J. Chem. Phys.* 1994, **100** (8), 5829-5835.
7. N. M. O'boyle, A. L. Tenderholt and K. M. Langner, *J. Comput. Chem.* 2008, **29** (5), 839-845.
